# Supplementary material for: High Spatial Resolution mapping of Precipitable Water Vapor using SAR interferograms, GPS observations and ERA-Interim reanalysis
Source: Copernicus journal article supplement (doi:10.5194/amt-2015-391), 2016-01-27
Supplement: Supplementary file [file amt-2015-391-AC1-supplement.pdf]

# High spatial resolution mapping of Precipitable Water Vapor using SAR interferograms, GPS observations and ERA-Interim reanalysis

W. Tang<sup>1</sup>, M. S. Liao<sup>1,2</sup>, and L. Zhang<sup>1</sup>, W. Li<sup>3</sup>, W. M. Yu<sup>4</sup>

[1]{State Key Laboratory of Information Engineering in Surveying, Mapping and Remote Sensing, Wuhan University, Wuhan, China}

[2]{Collaborative Innovation Center for Geospatial Technology, Wuhan University, Wuhan, China}

[3]{Shanghai Institute of Satellite Engineering, Shanghai, China}

[4]{Shanghai Academy of Spaceflight Technology, Shanghai, China}

Correspondence to: L. Zhang (luzhang@whu.edu.cn)

## Abstract

A high spatial **and temporal** resolution of the Precipitable Water Vapor (PWV) in the atmosphere is a key requirement for the short-scale weather forecasting and climate research. The aim of this work is to derive temporally-differenced maps of the spatial distribution of PWV by analyzing the **tropospheric** delay “noise” in Interferometric Synthetic Aperture Radar (InSAR). A time series maps of differential PWV were obtained by processing a set of ENVISAT ASAR images cover the area of Southern California, USA from 06 October 2007 to 29 November 2008. To get a more accurate PWV, the component of **hydrostatic** delay was calculated and subtracted by using ERA-Interim reanalysis products. In addition, the ERA-Interim was used to compute the conversion factors required to convert the zenith wet delay to water vapor. The InSAR-derived differential PWV maps were calibrated by means of the GPS PWV measurements over the study area. We validated our results against the measurements of PWV derived from the Medium Resolution Imaging Spectrometer (MERIS) which is located together with ASAR sensor onboard the ENVISAT satellite. Our comparative results show strong spatial correlations between the two data sets. The difference maps have Gaussian distributions with

批注 [d1]: Modified for comment #1

批注 [d2]: Modified for comment #4

批注 [d3]: Modified for comment #2

mean values close to zero and standard deviations below 2 mm. The advantages of the InSAR technique is that it provides water vapor distribution with a spatial resolution as fine as 20 m and an accuracy of ~2 mm. Such a high spatial resolution maps of PWV could lead to much greater accuracy in meteorological understanding and quantitative precipitation forecasts. [With the launch of Sentinel-1A satellites, every few days (12 days) a new SAR images can be acquired with a wide swath up to 250 km, enabling this a far unique operational service for InSAR-based water vapor maps with unprecedented spatial and temporal resolution. ]

批注 [d4]: Modified for comment #1

## 1 Introduction

The performance of Interferometric Synthetic Aperture Radar (InSAR) data when constructing digital elevation models (DEM) or precisely measuring surface deformation of the Earth is limited by the [tropospheric] delay mainly caused by the water vapor content in the lower part ( $\leq 1.5$  km) of the troposphere (Beauducel et al., 2000; Liao et al., 2013; Zebker et al., 1997). Although the water vapor contributes only about 10% of total atmospheric delay, this source of error is not easily eliminated due to its high spatial and temporal variability. Our aim in this paper is to investigate the [tropospheric] delay “noise” of InSAR as a meteorological signal to measure the water vapor content in the atmosphere. We will present a new approach for accurate water vapor constructing with a high spatial resolution by combining InSAR observations, GPS data, and a Global Atmospheric Model (ERA-Interim), and evaluate the performance.

批注 [d5]: Modified for comment #4

批注 [d6]: Modified for comment #4, and many more hereafter.

Various techniques have been applied to successive measurement of the horizontal and vertical distributions of water vapor in the atmosphere either from space or ground. Water vapor measurements produced by radiosondes or water vapor radiometers are limited in the spatial and temporal resolution. Global Navigation Satellite Systems (GNSS) provides water vapor measurements with a dense temporal sampling and high accuracy but the GNSS networks are too sparse and irregular to capture fine-scale water vapor fluctuations. The passive multispectral imager such as MEdium Resolution Imaging Spectrometer (MERIS) and Moderate Resolution Imaging Spectroradiometer (MODIS) only produce continuous water vapor maps during day time or under cloud-free weather conditions. These limitations are the main error source in short-term (0-24 hour) precipitation prediction. The advantage of satellite-based InSAR, a relative new tool for [measuring water vapor content], is that it could provide maps of water vapor with a spatial resolution as fine as 10-20 m over a swath of ground about 100 km wide.

批注 [d7]: Modified for comment #6

1 [The Sentinel-1A satellite, a new SAR mission launched in April 2014, providing a wide swath  
2 up to 250 km that gives this technique a more interesting perspective for meteorology studies.]

批注 [d8]: Added for comment #21.

3  
4 In this paper, we used the InSAR data in combination with GPS measurements and ERA-  
5 Interim reanalysis products to precisely estimate the water vapor content in the atmosphere.  
6 The main concept of InSAR for constructing water vapor maps is that the tropospheric phase  
7 delay is considered as our interested signal to be extracted and the other phase components are  
8 treated as noise to be removed. The tropospheric phase delay mainly consists of two  
9 components: hydrostatic delay and wet delay. The hydrostatic delay varies with local  
10 temperature and atmospheric pressure which is smooth in time and space, while the wet delay  
11 varies with water vapor partial pressure which is more spatially and temporally varying. Within  
12 a typical interferogram area of 100×100 km, the pressure usually varies less than 1hPa, while  
13 a significant changes of the water vapor partial pressure are common. Consequently, the wet  
14 delay in the interferogram is much greater than the hydrostatic delay. Therefore, most studies  
15 have focused on estimating the wet delay and neglected the hydrostatic delay. However, recent  
16 studies also show that hydrostatic delay varies significantly at low elevation and cannot be  
17 neglected (Doin et al., 2009; Jolivet et al., 2014). Thus, to obtain accurate PWV maps,  
18 hydrostatic delay in InSAR must be taken into account. In this work, we compute the  
19 component of hydrostatic delay by using ERA-Interim reanalysis products. Using the water  
20 vapor conversion factor, the InSAR-derived zenith wet delay is then mapped onto Precipitable  
21 Water Vapor (PWV), a quantity representing the water vapor content in the atmosphere. In this  
22 study, the outputs of temperature and specific humidity from ERA-Interim model are used to  
23 estimate this water vapor conversion factor. It should be noted that water vapor maps from  
24 InSAR are derived from the difference between the water vapor variations during two Synthetic  
25 Aperture Radar (SAR) images with a temporal separation of one or more days, we call  $\Delta$ PWV  
26 hereafter. The temporal interval relies on the space-borne InSAR mission: 1 day (tandem ERS-  
27 1/2), 11 days (TerraSAR-X, Cosmo-SkyMed), 12 days (Sentinel-1), 35 days (ENVISAT-ASAR,  
28 RADARSAT) and 46 days (ALOS-PALSAR). The main problem of this operation is that the  
29  $\Delta$ PWV maps is a relative measurement and requires absolute observations to calibrate each  
30  $\Delta$ PWV map. The calibration procedure was implemented by using absolute measurements of  
31 PWV from a few GPS stations in our study area. After that, the calibrated  $\Delta$ PWV maps were  
32 evaluated by comparing with the  $\Delta$ PWV from the collocated GPS stations. Finally, we made

批注 [d9]: Modified for comment 2#

批注 [d10]: Modified for comment 2#

批注 [d11]: Modified for comment 2#, and many more hereafter.

批注 [d12]: Modified for comment #23.

批注 [d13]: Modified for comment 6#, and many more hereafter.

a comparative analysis of  $\Delta$ PWV maps from InSAR and MERIS pixel by pixel, and by inspecting the spatial properties.

## 2 Study area and data sets

We carried out the study using data sets collected in the Los Angeles basin located in Southern California, USA. This study area neighbors the Pacific Ocean in the west and southwest and thus is rich with atmospheric water vapor and it is well covered by a dense network of continuous GPS receivers. These conditions make it particularly suitable for atmospheric water vapor studies. Figure 1 shows the topography map of the study area. A set of  $N=8$  ENVISAT ASAR [SLC] images were acquired over this region for the period between 06 October 2007 to 29 November 2008. [The image was acquired during descending passes, Track 170, with the average look angle  $\theta = 22.6^\circ$ . Actually, the value of look angle  $\theta$  varies over the SAR scene from near range to far range between  $16.5^\circ$  to  $23.2^\circ$ . Accuracy may improve, if local look angle of every pixels within interferogram is considered when calculating the mapping function. We used the average look angle in our study.] The acquisition time was 18:01 UTC. For SAR interferometric processing, an external DEM with 30 m height postings from Shuttle Radar Topography Mission (SRTM) (Farr et al., 2007) was used for removing the influence of topography and the Earth's curvature, while the precise orbit information from Delft Institute for Earth-Oriented Space Research was utilized for minimizing the orbital errors. The black square in Fig.1 shows the footprint of SAR images.

批注 [d14]: Modified for comment #15.

批注 [d15]: Modified for comment #24.

批注 [d16]: Modified for comment #18.

批注 [d17]: Modified for comment #13.

We used 29 permanent GPS stations in the Southern California Integrated GPS Network (SCIGN) within the SAR image scene to estimate atmospheric water vapor over Southern California. SCIGN is one of the densest GPS network in the world, with more than 250 continuously operated GPS stations. Most of the GPS stations of SCIGN have been integrated into the Plate Boundary Observatory (PBO) in 2008. PBO has two GPS Analysis Centers (ACs) that process raw GPS data and produces position solutions for stations in the PBO network as well as selected other stations. One AC is operated by the Geodesy Laboratory at Central Washington University (CWU) and uses the GIPSY/OASIS-II processing package. The other AC is located at the New Mexico Institute of Technology (NMT) and uses GAMIT/GLOBK. The analysis centers provide tropospheric data products including zenith atmospheric delay are archived at the UNAVCO Data Center and are openly and freely available (<http://www.unavco.org/data/data.html>). The availability of GPS measurements also allowed

us to separate possible surface deformation from the atmospheric signals in differential interferograms. The red triangles in Fig. 1 represent the locations of GPS stations.

The ERA-Interim reanalysis from European Centre for Medium-Range Weather Forecasts (ECMWF) is used to produce maps of hydrostatic delay and water vapor conversion factor. ERA-Interim is a global atmospheric model which was instigated to address some of the problems seen in ERA-40 (Dee et al., 2011). It is based on 4-dimensional variational assimilation of global surface and satellite meteorological data. The outputs of ERA-Interim used in our study are estimates of temperature, specific humidity, and geopotential height, defined at 37 pressure levels (1000–1 hPa), and a spatial resolution of  $0.75^\circ$  (~75 km). The black crosses in Fig. 1 shows the distribution of ERA-Interim model grid nodes used in this study. The MERIS is located together with ASAR sensor on board of ENVISAT satellite (Bennartz and Fischer, 2001), thus the simultaneous water vapor measurements from MERIS were used as a reference data for comparison and evaluation.

### 3 Estimating PWV from InSAR

Here, we present the methods for obtaining zenith wet delay from SAR interferogram and converting it to PWV. In Sect.3.1, the retrieval of zenith wet delay from SAR interferogram is described. Section 3.2 describes the method for computing the conversion factor required to map the zenith wet delay onto PWV by using ERA-Interim reanalysis. In Sect.3.2, the approach for calibrating the PWV estimated from InSAR using GPS observations is discussed.

#### 3.1 Atmospheric delay in InSAR

The unwrapped interferometric phase for each pixel in an interferogram is given by the superposition of several components including topography, Earth surface displacement, and atmosphere. It can be written as:

$$\phi_{int} = \phi_{topo} + \phi_{defo} + \phi_{orb} + \phi_{atm} + \phi_{noise} \quad (1)$$

where  $\phi_{topo}$  is the phase contribution from land topography,  $\phi_{defo}$  represents the ground deformation between the acquisitions,  $\phi_{orb}$  counts for the phase caused by inaccurate satellite orbit,  $\phi_{atm}$  indicates the atmospheric state variations during SAR acquisitions and  $\phi_{noise}$  denotes the noise component including system thermal noise, decorrelation noise, co-

批注 [d18]: Modified for comment #25.

registration noise and processing noise. The contribution of topography is compensated for by using an external DEM (30 m SRTM DEM are used in this study, Fig. 2a). An example of original unwrapped interferogram (master image-16 August 2008, slave image-25 October 2008) is shown in Fig. 2b, with the topographic phase component subtracted. The orbital error was modeled by a network de-ramping method described in [oliviet et al. (2011)] and estimated separately from the unwrapped phase. A strong, localized, vertical displacement in the Los Angeles Basin areas was observed in a number of interferograms although those interferograms possess short temporal baselines. The rapidly subsiding displacement area in the Los Angeles Basin region was masked out from all interferograms to avoid mixing the atmospheric signal with surface deformation. [After subtracting the topographic phase and orbital ramp, the residual phase in the unwrapped interferograms only result from the atmospheric delay, which can be split into hydrostatic, wet, liquid, and ionospheric components. In this study, we focus only on the hydrostatic and wet components in the troposphere, as the delay induced by liquid water is expected to be small under usual conditions, and the ionospheric components are assumed to be small for C-band SAR signal (Hanssen, 2001). Thus, leading to the tropospheric phase delay

$\phi_{trop}$  as]

$$\phi_{trop} = \phi_{hyd} + \phi_{wet} \quad (2)$$

where

$$\phi_{hyd} = -\frac{4\pi}{\lambda \cos \theta_{inc}} 10^{-6} \left[ \frac{k_1 R_d}{g_0} (P(z) - P(z_0)) \right] \quad (3)$$

$$\phi_{wet} = -\frac{4\pi}{\lambda \cos \theta_{inc}} 10^{-6} \int_{z_0}^{z_{ref}} \left[ \left( k_2 - \frac{R_d}{R_v} k_1 \right) \frac{e}{T} + k_3 \frac{e}{T^2} \right] dz \quad (4)$$

The hydrostatic delay  $\phi_{hyd}$  is calculated using the specific gas constant for hydrostatic air  $R_d$ , gravity acceleration at ground level  $g_0$ , and air pressure  $P$ . The wet delay  $\phi_{wet}$  is computed using the partial pressure of water vapor  $e$ , water vapor specific gas constant  $R_v$ , and temperature  $T$ .  $z_0$  is the ground level and  $z_{ref}$  represents a reference height (30 km used in this study) above which the delay is assumed to be nearly unchanged with time. The atmospheric refractivity constants  $k_1$ ,  $k_2$  and  $k_3$  are determined in (Smith and Weintraub, 1953) and  $\left( k_2 - \frac{R_d}{R_v} k_1 \right)$  is often named  $k'_2 = 0.233 \text{ KPa}^{-1}$ .  $\lambda$  is the radar wavelength and  $-\frac{4\pi}{\lambda}$  is a scale factor to convert the delay in millimeter into phase in radian.  $\theta_{inc}$  is the radar incidence angle and the factor  $\frac{1}{\cos \theta_{inc}}$  is a mapping function applied to project the delay from the

批注 [d19]: Modified for comment #26.

批注 [d20]: Modified for comment #3 and #5

批注 [d21]: Modified for comment #2

批注 [d22]: Added according to comment #27 and #28.

zenith direction to the radar line-of-sight (LOS). The constants in Eqs. (3) and (4) are listed in Table 2.

The hydrostatic component of tropospheric delay depends on the variations of the atmospheric pressure. This pressure at a given altitude changes over time, even if small, can reach to the total pressure of a few percent, resulting the difference of hydrostatic delay to a few centimeters. Moreover, the changes of terrain height introduce a spatial gradient in the atmospheric pressure across the SAR scene, which results in a spatially variable signal in the hydrostatic delay (Mateus et al., 2013b). The variation of hydrostatic delay depending on the topography could be up to 15 mm in our study area. Therefore, in order to accurately derive the wet delay, the hydrostatic delay must be precisely estimated and subtracted from the total tropospheric delay. This delay can be calculated if the atmospheric pressure is known along the signal propagation path or along the zenith direction. In this work, we used the vertical profiles of atmospheric pressure provided by ERA-Interim reanalysis products to predict this component of hydrostatic delay. We interpolated the atmospheric pressure onto altitude profiles at each ERA-Interim model grids using a spline interpolation and calculated the hydrostatic delay using Eq. (3). The resulting vertical profiles of hydrostatic delay were horizontally interpolated to the resolution of SAR interferogram using a bilinear interpolation. We also used the outputs of temperature and relative humidity from ERA-Interim to produce the maps of water vapor conversion factor using the same interpolation strategy; this will be discussed in next subsection. The map of hydrostatic delay is displayed in Fig. 2c, this delay represents a long-wavelength signal and is smooth in space, rose up to 1 cm on the mountain areas. The slant wet delay (Fig. 2d) was obtained by subtracting the hydrostatic delay from the total tropospheric delay. The slant wet delay difference in LOS was converted to the Zenith Wet Delay difference ( $\Delta ZWD$ ) in millimeter using a simple mapping function:

$$\Delta ZWD_{InSAR} = -\frac{\lambda \cos \theta_{inc}}{4\pi} \phi_{wet} \quad (5)$$

### 3.2 Conversion of ZWD into PWV

The zenith wet delay is considered as a measurement of the water vapor content in the atmosphere. The relationship between the ZWD and PWV can be expressed as (Bevis et al., 1994):

批注 [d23]: Modified for comment #7.

批注 [d24]: Modified for comment #29.

$$\text{PWV} = \kappa \times \text{ZWD} \quad \text{or} \quad \text{ZWD} = \Pi \times \text{PWV} \quad (6)$$

where  $\kappa$  is the water vapor conversion factor and  $\Pi = \kappa^{-1}$  is calculated by the following equation.

$$\Pi = 10^{-6} \rho R_v \left( \frac{k_a}{T_m} + k_2 - \frac{R_d}{R_v} k_1 \right) \quad (7)$$

where  $\rho$  is the density of the liquid water (listed in Table 2).  $T_m$  is the weighted mean temperature of the atmosphere and it is related to the surface temperature  $T_s$  in degrees Kelvin (Bevis et al., 1992).

$$T_m = 70.2 + 0.72 \times T_s$$

Using this relationship to estimate  $T_m$  will produce approximately 2% error in PWV (Bevis et al., 1992). The most accurate way to compute the mean temperature is to calculate the following integral equation between the ground surface  $z_0$  and the reference height  $z_{ref}$ , given by (Davis et al., 1985),

$$T_m = \frac{\int_{z_0}^{z_{ref}} (e/T) dz}{\int_{z_0}^{z_{ref}} (e/T^2) dz} \quad (9)$$

The value of  $\Pi$  is dimensionless and usually ranges from 6.0 to 6.5 (and could be up to 7.0 at some circumstances) (Bevis et al., 1992). For the purpose of rough conversion between ZWD and PWV, an empirical constant  $\Pi = 6.25$  ( $\kappa = 0.16$ ) was used. However, the actual value of  $\kappa$  changes with water vapor pressure and temperature that minor errors in  $\kappa$  could result in significant biases in PWV. For example, using the constant value  $\kappa = 0.16$  and assuming the ZWD as 200 mm, the corresponding value of PWV is 32 mm. However, if the value of  $\kappa$  is computed using Eqs. (7) and (9) as 0.15, then the value of PWV will be 30 mm. In fact, the larger the ZWD, the more critical is the value of  $\kappa$ . Rather than using the empirical constant value, we evaluated the conversion factor  $\kappa$  at each pixel of the SAR interferogram using ERA-Interim reanalysis. To compute the weighted mean temperature  $T_m$ , the outputs of ERA-Interim we used are the vertical profiles of temperature and relative humidity. The relative humidity is converted to partial pressure of water vapor  $e$  by a mixed Clausius-Clapeyron law (Jolivet et al., 2011). To evaluate the sensitivity of  $\Pi$  to the weighted mean temperature  $T_m$ , its values are computed over 120 days (10 days in one month) in the year of 2007 and 2008. Figure 3 plots  $\Pi$  against  $T_m$  that is estimated using outputs of  $e$  and  $T$  from the three ERA-Interim model grids (indicated as the black crosses in Fig. 1) located within the SAR scene.

批注 [d25]: Modified for comment #8.

批注 [d26]: Modified for comment #8, and also hereafter in the text.

批注 [d27]: Modified for comment 30.



From Fig. 3, we observed that the value of  $\Pi$  changes with  $T_m$ , and  $\Pi$  is in the range of 6.09 to 6.79 in the year of 2007 (Fig. 3a), whereas it varies between 6.17 and 6.74 in the year of 2008 (Fig. 3b). The fitted average curves linearly decrease with rates of -0.0214/K and -0.0221/K, respectively. As expected that the value of  $\Pi$  is much higher on winter days (low temperature) than summer days (high temperature). On the other hand, since the temperature generally decreases with altitude in the troposphere, the conversion factor is correlated with the elevation. Therefore, using the empirical value of  $\kappa = 0.16$  is not appropriate for the whole study area; rather its value is calculated using global atmospheric model ERA-Interim. Figure 4 shows the spatial distribution map of  $\Pi$  on 16 August 2008 produced by ERA-Interim. It can be seen that the value of  $\Pi$  varies spatially and it has a higher value on the mountainous areas than those areas with a flat terrain. [We then averaged the spatial maps of  $\Pi$  at the two interferometric acquisition time to derive the conversion factors for mapping the wet delay onto water vapor.]

批注 [d28]: Added according to comment #19.

### 3.3 InSAR PWV calibrated by GPS PWV

[PWV estimated from GPS is not directly comparable with  $\Delta$ PWV estimated from InSAR.] The unwrapping procedure introduces an arbitrary constant in the unwrapped phase, so the InSAR technique can just measure the  $\Delta$ PWV as a relative measurement whereas the GPS-based  $\Delta$ PWV is an absolute value. To resolve this problem,  $\Delta$ PWV maps derived from InSAR are calibrated by GPS-based  $\Delta$ PWV. It should be noted that only the signals from satellites with elevation angle larger than the cutoff elevation angle are recorded by the GPS receiver. [Thus, the PWV estimates from GPS are derived by weighted by the elevation and azimuth angles of the individual ray paths from the GPS satellites to the receiver.] All observations outside this cone are discarded. Figure 5 shows the schematic diagram of this effect. The cutoff elevation angle is set to  $15^\circ$  and assumes the water vapor concentrated in the lower part (1.4 km) of the troposphere, the corresponding cone radius is approximately 5.4 km. We averaged the  $\Delta$ PWV values of the interferogram pixels located within the corresponding circular area before comparing InSAR measurements to that of GPS. We calculated the temporal difference of the PWV at each GPS station, at about the same acquisition time of the two interferometric SAR images. The InSAR  $\Delta$ PWV calibration process is to determine the constant  $K$  by minimizing the following cost function (Mateus et al., 2013a).

批注 [d29]: Modified for comment #31.

批注 [d30]: Modified for comment #10

$$\sum_{k=1}^{N_{\text{GPS}}} \left\{ \Delta \text{PWV}_k^{\text{GPS}} - \frac{1}{N_p(k)} \sum_{i=1}^{N_p(k)} \Delta \text{PWV}_i^{\text{InSAR}} + K \right\}^2 \quad (10)$$

where  $N_{\text{GPS}}$  is the number of GPS receivers,  $N_p(k)$  is the number of InSAR pixels located within the circular area around the  $k$ th GPS receiver,  $\Delta \text{PWV}_k^{\text{GPS}}$  is the temporal difference of PWV between master and slave dates by GPS,  $\Delta \text{PWV}_i^{\text{InSAR}}$  represents the  $\Delta \text{PWV}$  estimated by InSAR. Finally, the relative map of the  $\Delta \text{PWV}$  in interferograms were calibrated by adding the constant  $K$  to  $\Delta \text{PWV}^{\text{InSAR}}$  map.

#### 4 Results and discussion

In this section, we will evaluate and validate the performance of **InSAR-based water vapor maps** by comparing the calibrated  $\Delta \text{PWV}$  estimated from InSAR to  $\Delta \text{PWV}$  measurements from GPS, as well as measured values from MERIS. The evaluation was conducted as follows. PWV measurements at each GPS station were compared to PWV from MERIS. This comparison is important since possible errors in the GPS PWV can be detected by comparing to MERIS PWV, a relatively high accuracy retrieval of water vapor (Li et al., 2003). The calibrated  $\Delta \text{PWV}$  maps of InSAR are compared to the absolute value of  $\Delta \text{PWV}$  at each GPS station. This comparison helps to check the orbital errors due to the inaccurate satellite ephemeris and to verify that the unwrapped phase is only due to tropospheric delay and not to the earth surface displacement. The last step is to compare the calibrated InSAR time series maps of  $\Delta \text{PWV}$  to the MERIS water vapor maps on a pixel-wise basis. In such a way, it is possible to cross validate the accuracy of water vapor measurements and also inspect their spatial distribution properties.

##### 4.1 GPS PWV measurements

The tropospheric products analyzed by CWU on the 29 GPS stations (Fig. 1) are used in this study. These products provide the zenith tropospheric delay at each GPS stations every 5 minutes. The high temporal sampling of GPS measurements makes us enable to obtain the zenith wet delay at a time as close as possible to the SAR images acquisition time. The cutoff elevation angle ( $\theta_{\text{cut}} = 15^\circ$ ) was accepted in the GPS data processing. The Saastamoinen model and gridded Vienna Mapping Function (VMF1GRID) (Kouba, 2007) were used for calculating a priori values of zenith hydrostatic delay. The zenith wet delay was then obtained by subtracting the zenith hydrostatic delay from the total delay and the PWV was finally obtained

批注 [d31]: Citation is added for comment #32.

1 by Eq. (6) using the water vapor conversion factor estimated from ERA-Interim reanalysis  
2 products.

3

4 As an example of the GPS PWV, Fig. 6 displays the 24-hour time series of the PWV estimated  
5 from GPS observations at 29 stations on 15 December 2007 (winter), 03 May 2008 (spring), 16  
6 August 2008 (summer) and 25 October 2008 (autumn), four of the SAR acquisition dates in our  
7 study. In summer, high temperature causes water to evaporate from the surface of lakes and  
8 oceans, resulting in higher PWV content and more variable, whereas in autumn and winter, the  
9 lower and smoother PWV were observed due to dry weather conditions.

10

11 In Fig. 7, we plot PWV measurements derived from MERIS against PWV results estimated  
12 from GPS at 29 stations on the four SAR acquisition days (in Fig. 6). Since GPS PWV estimates  
13 represent average values over the reversed cone with a ~5.4 km radius base, we averaged the  
14 PWV from MERIS within the circular area around the location of the GPS stations. The result  
15 shows a strong correlation (0.95) between GPS and MERIS. The mean absolute error (MAE)  
16 of the differences between the two data sets does not exceed 0.5 mm and the root mean square  
17 (RMS) value is 0.60 mm. The slope of the line in Fig. 7 is 0.98. Thus GPS and MERIS  
18 measurements of water vapor are in a good agreement as we should not expect a perfect  
19 correlation between the two data sets because we averaged the conical effect of GPS with a  
20 circle and there is noise in both data sets.

## 21 4.2 InSAR $\Delta$ PWV measurements

22 The eight ENVISAT ASAR images are used for interferometric processing. The constraints for  
23 normal baseline (< 300 m) and temporal baseline (<105 days) are used in order to minimize the  
24 effects of ground deformation and decorrelation noise. Table 1 summarizes the baseline  
25 information and the height ambiguity for all of the interferograms. The height ambiguity is  
26 defined as the altitude difference that generates an interferometric phase change of  $2\pi$  after  
27 interferogram flattening. In principle, the smaller value of the height ambiguity, the lesser  
28 sensitivity of the interferometric phase to the possible errors in the external DEM. Small values  
29 of height ambiguity ensures that interferometric phase is primarily related to atmospheric delay.

30 [We used the DORIS software (Kampes et al., 2003) for interferogram formation and the small  
31 baseline technique in StaMPS software (Hooper et al., 2007) for selecting phase stable points.]

批注 [d32]: Modified for comment #12 and #14.

1 Adaptive power spectrum filter have been applied to interferograms to reduce phase noise  
2 (Goldstein and Werner, 1998). All interferograms were multilooked by 40 looks in azimuth and  
3 8 looks in range to enhance the coherence quality and improve the phase unwrapping accuracy.  
4 The multilook processing resulted in a reduction of the spatial resolution of the interferograms  
5 to  $160 \times 160$  m. The wrapped phases were unwrapped using a branch cut algorithm (Goldstein  
6 et al., 1988) and possible orbital errors were corrected by network de-ramping method.  
7 **Oscillator drifts induce a systematic phase ramp in the interferogram from ENVISAT satellite**  
8 **(Marinkovic and Larsen, 2015), they were removed by the script provided in the StaMPS**  
9 **software.** The local rapid ground subsiding region was masked out. The wet delay differences  
10 of InSAR were obtained by subtracting the component of hydrostatic delay predicted from  
11 ERA-Interim. The wet delay differences were finally mapped onto  $\Delta$ PWV maps using the  
12 water vapor conversion factor as explained in Sect. 3.2.

13 Due to the fact that the unwrapped processing introduced an arbitrary constant into the phase,  
14 all the  $\Delta$ PWV maps from InSAR were relative measurements. Therefore, we need the  
15 calibration by using the ground measurements of PWV from GPS. The GPS PWV values were  
16 estimated from the zenith wet delay provided by the CWU data analysis center as described in  
17 previous section. The overpass time of ENVISAT satellite was 18:01 UTC, thus we computed  
18 the temporal difference of the PWV at each GPS station at time 18:00 UTC, making the time  
19 differences negligible. Using the  $\Delta$ PWV estimates from GPS, the  $\Delta$ PWV maps of InSAR  
20 were calibrated by solving the cost function (Eq. (10)) as described in Sect. 3.3. A comparison  
21 of the calibrated  $\Delta$ PWV from the interferogram (master image-16 August 2008, slave image-  
22 25 October 2008, see Fig. 2) and  $\Delta$ PWV from the 29 GPS stations is displayed in Fig. 8a. The  
23 slope of the line in this figure is 0.73 while the correlation coefficient is 0.95, suggesting the  
24 GPS and InSAR measurements of PWV are in reasonable agreement although there is noise in  
25 both data sets. Figure 8b plots the  $\Delta$ PWV from GPS and InSAR as a function of elevation.  
26 This plot shows that the content of water vapor depends on the altitude and decreases as the  
27 altitude increases. The GPS site WLSN has the highest elevation among all GPS stations, so it  
28 shows the lowest water vapor content. The global negative correlation between  $\Delta$ PWV and  
29 altitude (Fig. 8b) implies that the absolute humidity in the bottom layer of atmosphere was  
30 smaller at the acquisition time of the slave image than at the acquisition time of the master  
31 image. The quantitative comparison of this interferogram is summarized in Table 3. It can be  
32 seen that most of differences are smaller than 2 mm. The MAE of  $\Delta$ PWV between GPS and  
33 InSAR is 0.70 mm and the RMS value is 0.91 mm. It is worth noting that, large differences

批注 [d33]: Added according to comment #11

1 between InSAR and GPS at stations CGDM, ECFS and WLSN (indicated by the black arrows  
2 in Fig. 8) were observed, especially the largest difference (-2.84 mm) at station WLSN. The  
3 standard deviations of InSAR pixels located within the circular area around these three GPS  
4 stations also show a high value (the fourth column in Table 3). The three GPS stations are  
5 located in mountain areas with an altitude 730, 820, 1700 meters for the CGDM, ECFS and  
6 WLSN stations, respectively. This interferogram also show a high value for height ambiguity  
7 (290.90 m). Therefore, we can conclude that the large discrepancies between InSAR and GPS  
8 for these three stations are most possibly due to the topographic phase error during  
9 interferometric processing.

10  
11 The comparisons of  $\Delta$ PWV from the two techniques at each GPS station for the ten  
12 interferograms are shown in Fig. 9. A good agreement between the InSAR and GPS was found  
13 in the whole data sets. Large differences between InSAR and GPS at stations CGDM, ECFS  
14 and WLSN were also found on those interferograms with a high value of height ambiguity  
15 (interferograms 1, 2, 4 and 7 in Table 1). The PWV estimates from the two techniques  
16 characterized by different sampling properties both in space and time. GPS can provide an  
17 absolute value of the PWV every five minutes but refers to the parts of atmosphere observed  
18 within a cone whose radius depends on the elevation cutoff angle, whereas InSAR gives a high  
19 spatial resolution map of the  $\Delta$ PWV with a time separation of 35 days or more. The high  
20 temporal sampling of GPS and high spatial resolution of InSAR are complementary for  
21 numerical weather modeling, which will improve the model resolution and give a better  
22 understanding of the structure of atmospheric patterns.

### 23 4.3 Validation using water vapor measurements from MERIS

24 In this section, we will evaluate and analyze the accuracy of time series of the calibrated  $\Delta$ PWV  
25 maps derived from InSAR to confirm the performance of this technique as a tool for  
26 constructing PWV maps. We carry out a cross-validation pixel by pixel using cloud-free [water  
27 vapor pixels] by MERIS acquired simultaneously with the ENVISAT ASAR images. The water  
28 vapor content is expressed as integrated water vapor (IWV) in the MERIS products. The  
29 theoretical accuracy of the MERIS IWV under cloud-free conditions over land is  $0.16 \text{ g m}^{-2}$   
30 [Bennartz and Fischer, 2001] at full resolution (~300 m), which corresponds to 1.6 mm  
31 accuracy in PWV. This accuracy will deteriorate under cloudy conditions or over water surfaces.

批注 [d34]: Modified for comment #33.

批注 [d35]: Citation added for comment #20.

The percentage of cloud-free conditions for MERIS data we used in this study are larger than 90% except for the image acquired on 29 November 2008 having a coverage percentage of 80%. For the sake of comparison, we built differences of PWV maps ( $\Delta$ PWV) from MERIS. [This is performed based on the software package called TRAIN (Toolbox for Reducing Atmospheric InSAR Noise) (Bekaert et al., 2015)]. In Fig. 10, are shown the calibrated  $\Delta$ PWV maps derived from the ten interferograms (in Table 1) and the corresponding  $\Delta$ PWV maps from MERIS data. The first column shows the  $\Delta$ PWV derived from InSAR that have been calibrated with GPS observations. The  $\Delta$ PWV from MERIS are shown in the second column. The third column shows the scatter plot of  $\Delta$ PWV with InSAR on the abscissa and MERIS on the ordinate scale. The histogram of the frequency distributions of the differences between InSAR and MERIS are shown in the fourth column. For all images, the correlation coefficients (Corr) between InSAR and MERIS are computed as well as the root mean square (RMS), mean ( $\mu$ ), and standard deviation ( $\sigma$ ) of the differences between the two data sets. From visual comparison, InSAR  $\Delta$ PWV and MERIS  $\Delta$ PWV show a large spatial correspondence. Furthermore, the quantitative comparisons indicate high correlation coefficients (Corr>0.7) between the two data sets, except for interferogram 3 (master image-15 December 2007, slave image-19 January 2008) and interferogram 9 (master image-16 August 2008, slave image-29 November 2008) having correlation coefficient of Corr=0.5 and Corr=0.67, respectively. The differences between the InSAR and MERIS maps follow a Gaussian distribution with mean values close to zero and standard deviations less than 2mm.

## 5 Conclusion

In this paper, we presented the results of the temporal evolution of the PWV over Southern California, USA using SAR interferograms during the period from 06 October 2007 to 29 November 2008. Interferograms were spatially averaged and spatial resolution was reduced to 160×160 m. In order to improve the quality maps of atmospheric water vapor, the hydrostatic delay was precisely estimated by using ERA-Interim reanalysis products. We also used the outputs from ERA-Interim to produce maps of the conversion factor for mapping zenith wet delay onto PWV at each pixel in the radar scene. All maps of  $\Delta$ PWV derived from interferograms were calibrated using a network of 29 continuous GPS stations located in the SAR scene. The PWV estimates from InSAR and MERIS show strong agreement with the data from GPS. Since the GPS PWV estimates represent the average of the tropospheric effect within a cone above the receiver, InSAR and MERIS pixels were aggregated to enable a proper

批注 [d36]: Added according to comment #17.

1 comparison. The comparative analysis between InSAR and MERIS  $\Delta$ PWV maps demonstrate  
2 strong spatial correlation with a less than 2 mm standard deviation for the difference. Our study  
3 demonstrates that satellite **Synthetic Aperture Radar** interferometry can be applied to study the  
4 spatial distribution of the PWV with a spatial resolution of 20 m and an accuracy of ~2 mm.  
5 This advantage of InSAR provides unsurpassed insights in capturing the small-scale water  
6 vapor distribution. This property could be important for numerical weather forecasting models.  
7 Furthermore, forecasting models could take advantage of this source of water vapor maps to  
8 enhance the accuracy of their assimilation systems. In turn, the more accurate atmospheric  
9 prediction models can be used to correct the **tropospheric** delay affected by water vapor in the  
10 application of geodesy.

批注 [d37]: Modified for comment #34.

## 12 Acknowledgements

13 The authors thank ESA for the ENVISAT ASAR images and MERIS data. The authors would  
14 like to thank the GPS data provider: UNAVCO Data Center. This project was supported by the  
15 National Natural Science Foundation of China (grant no. 61331016). I would also like to thank  
16 Stephen C. McClure for his helpful comments and suggestions on this manuscript.

## References

- Beauducel, F., Briole, P., and Froger, J.-L.: Volcano-wide fringes in ERS synthetic aperture radar interferograms of Etna (1992–1998): Deformation or tropospheric effect?, *Journal of Geophysical Research*, 105, 16391–16402, 2000.
- Bekaert, D. P. S., Walters, R. J., Wright, T. J., Hooper, A. J., and Parker, D. J.: Statistical comparison of InSAR tropospheric correction techniques, *Remote Sensing of Environment*, 170, 40–47, 2015.
- Bennartz, R. and Fischer, J.: Retrieval of columnar water vapour over land from backscattered solar radiation using the Medium Resolution Imaging Spectrometer, *Remote Sensing of Environment*, 78, 274–283, 2001.
- Bevis, M., Businger, S., Chiswell, S., Herring, T. A., Anthes, R. A., Rocken, C., and Ware, R. H.: GPS meteorology: Mapping zenith wet delays onto precipitable water, *Journal of Applied Meteorology and Climatology*, 33, 379–386, 1994.
- Bevis, M., Businger, S., Herring, T. A., Rocken, C., Anthes, R. A., and Ware, R. H.: GPS meteorology : Remote sensing of atmospheric water vapor using the global positioning system, *Journal of Geophysical Research*, 97, 15787–15801, 1992.
- Davis, J. L., Herring, T. A., Shapiro, I. I., Rogers, A. E. E., and Elgered, G.: Geodesy by radio interferometry: Effects of atmospheric modeling errors on estimates of baseline length, *Radio Science*, 20, 1593–1607, 1985.
- Dee, D. P., Uppala, S. M., Simmons, A. J., Berrisford, P., Poli, P., Kobayashi, S., Andrae, U., Balmaseda, M. A., Balsamo, G., Bauer, P., Bechtold, P., Beljaars, A. C. M., van de Berg, L., Bidlot, J., Bormann, N., Delsol, C., Dragani, R., Fuentes, M., Geer, A. J., Haimberger, L., Healy, S. B., Hersbach, H., H  m, E. V., Isaksen, I., K  lberg, P., K  hler, M., Matricardi, M., McNally, A. P., Monge-Sanz, B. M., Morcrette, J. J., Park, B. K., Peubey, C., de Rosnay, P., Tavolato, C., Th  paut, J. N., and Vitart, F.: The ERA-Interim reanalysis: configuration and performance of the data assimilation system, *Quarterly Journal of the Royal Meteorological Society*, 137, 553–597, 2011.
- Doin, M. P., Lasserre, C., Peltzer, G., Cavali   O., and Doubre, C.: Corrections of stratified tropospheric delays in SAR interferometry: Validation with global atmospheric models, *Journal of Applied Geophysics*, 69, 35–50, 2009.
- Farr, T. G., Rosen, P. A., Caro, E., Crippen, R., Duren, R., Hensley, S., Kobrick, M., Paller, M., Rodriguez, E., Roth, L., Seal, D., Shaffer, S., Shimada, J., Umland, J., Werner, M., Oskin, M., Burbank, D., and Alsdorf, D.: The Shuttle Radar Topography Mission, *Reviews of Geophysics*, 45, 2007.
- Goldstein, R. M. and Werner, C. L.: Radar interferogram filtering for geophysical applications, *Geophysical Research Letters*, 25, 4035–4038, 1998.
- Goldstein, R. M., Zebker, H. A., and Werner, C. L.: Satellite radar interferometry: Two-dimensional phase unwrapping, *Radio Science*, 23, 713–720, 1988.
- Hanssen, R.: "Radar interferometry", in *Data Interpretation and Error Analysis*, Delft Univ. Technol., Delft, The Netherlands, 2001.
- Hooper, A., Segall, P., and Zebker, H.: Persistent scatterer interferometric synthetic aperture radar for crustal deformation analysis, with application to Volc  n Alcedo, Gal  pagos, *Journal of Geophysical Research*, 112, 2007.
- Jolivet, R., Agram, P. S., Lin, N. Y., Simons, M., Doin, M.-P., Peltzer, G., and Li, Z.: Improving InSAR geodesy using Global Atmospheric Models, *Journal of Geophysical Research: Solid Earth*, 119, 2324–2341, 2014.
- Jolivet, R., Grandin, R., Lasserre, C., Doin, M. P., and Peltzer, G.: Systematic InSAR tropospheric phase delay corrections from global meteorological reanalysis data, *Geophysical*



1 Research Letters, 38, 2011.

2 Kampes, B. M., Hanssen, R. F., and Perski, Z.: Radar interferometry with public domain tools,

3 Proceedings Fringe 2003, 2003.

4 Kouba, J.: Implementation and testing of the gridded Vienna Mapping Function 1 (VMF1),

5 Journal of Geodesy, 82, 193-205, 2007.

6 Li, Z. H., Muller, J. P., and Cross, P.: Comparison of precipitable water vapor derived from

7 radiosonde, GPS, and Moderate-Resolution Imaging Spectroradiometer measurements, Journal

8 of Geophysical Research, 108, 2003.

9 Liao, M., Jiang, H., Wang, Y., Wang, T., and Zhang, L.: Improved topographic mapping through

10 high-resolution SAR interferometry with atmospheric effect removal, ISPRS Journal of

11 Photogrammetry and Remote Sensing, 80, 72-79, 2013.

12 Marinkovic, P. and Larsen, Y.: On resolving the local oscillator drift induced phase ramps in

13 ASAR and ERS1/2 interferometric data - the final solution, Fringe 2015 workshop (ESA SP-

14 731), 2015.

15 Mateus, P., Nico, G., and Catalão, J.: Can spaceborne SAR interferometry be used to study the

16 temporal evolution of PWV?, Atmospheric Research, 119, 70-80, 2013a.

17 Mateus, P., Nico, G., Tome, R., Catalão, J., and Miranda, P. M. A.: Experimental study on the

18 atmospheric delay based on GPS, SAR interferometry, and numerical weather model data, IEEE

19 Transactions on Geoscience and Remote Sensing, 51, 6-11, 2013b.

20 Smith, E. K. and Weintraub, S.: The constants in the equation for atmospheric refractive index

21 at radio frequencies, Proceedings of the IRE, 41, 1035-1037, 1953.

22 Zebker, H. A., Rosen, P. A., and Hensley, S.: Atmospheric effects in interferometric synthetic

23 aperture radar surface deformation and topographic maps, Journal of Geophysical Research,

24 102, 7547-7563, 1997.

25

26

27 Table 1. Acquisition dates of master and slave images and their parameter information.

| Number | Master<br>(DDMMYYYY) | Slave<br>(DDMMYYYY) | Normal<br>baseline<br>(m) | Temporal<br>baseline<br>(days) | Height<br>ambiguity<br>(m) |
|--------|----------------------|---------------------|---------------------------|--------------------------------|----------------------------|
| 1      | 06 October 2007      | 15 December 2007    | -62.75                    | 70                             | 146.83                     |
| 2      | 06 October 2007      | 19 January 2008     | 36.16                     | 105                            | 254.84                     |
| 3      | 15 December 2007     | 19 January 2008     | 98.34                     | 35                             | 93.77                      |
| 4      | 19 January 2008      | 03 May 2008         | -51.85                    | 105                            | 177.05                     |
| 5      | 03 May 2008          | 07 June 2008        | 217.11                    | 35                             | 42.54                      |
| 6      | 03 May 2008          | 16 August 2008      | -191.01                   | 105                            | 48.30                      |
| 7      | 07 June 2008         | 16 August 2008      | -27.67                    | 70                             | 333.19                     |
| 8      | 16 August 2008       | 25 October 2008     | 31.72                     | 70                             | 290.90                     |

批注 [d38]: Modified for comment #35.

|    |                 |                  |         |     |       |
|----|-----------------|------------------|---------|-----|-------|
| 9  | 16 August 2008  | 29 November 2008 | -298.42 | 105 | 30.92 |
| 10 | 25 October 2008 | 29 November 2008 | -284.21 | 35  | 32.48 |

Table 2. Constants used for calculating atmospheric delay (Smith and Weintraub, 1953).

| Constant | Value                                         |
|----------|-----------------------------------------------|
| $R_d$    | $287.05 \text{ Jkg}^{-1} \text{K}^{-1}$       |
| $R_v$    | $461.95 \text{ Jkg}^{-1} \text{K}^{-1}$       |
| $g_0$    | $9.81 \text{ ms}^{-2}$                        |
| $k_1$    | $0.776 \text{ KPa}^{-1}$                      |
| $k_2$    | $0.716 \text{ KPa}^{-1}$                      |
| $k_3$    | $3.75 \times 10^3 \text{ K}^2 \text{Pa}^{-1}$ |
| $\rho$   | $1000 \text{ kgm}^{-3}$                       |

批注 [d39]: Citation is added for comment #36.

Table 3. Assessment of  $\Delta \text{PWV}$  maps obtained by InSAR (after calibration of offset using GPS (master image-16 August 2008, slave image-25 October 2008). For each GPS station, PWV differences from GPS between master and slave SAR acquisition times are computed and compared to the average values of InSAR estimates at pixels located within a circular area of 5.4 km around each GPS station. Differences are summarized in the last column. MAE and Std represent the mean absolute error and standard deviation.

| Number | GPS station | Longitude (°) | Latitude (°) | $\Delta \text{PWV}_{\text{GPS}}$ (mm) | $\Delta \text{PWV}_{\text{InSAR}}$ |          | Difference (mm) |
|--------|-------------|---------------|--------------|---------------------------------------|------------------------------------|----------|-----------------|
|        |             |               |              |                                       | Mean (mm)                          | Std (mm) |                 |
| 1      | AZU1        | -117.896      | 34.126       | 28.94                                 | 28.62                              | 0.65     | 0.32            |
| 2      | BGIS        | -118.159      | 33.967       | 30.15                                 | 29.92                              | 0.47     | 0.23            |
| 3      | BKMS        | -118.094      | 33.962       | 29.89                                 | 29.64                              | 0.28     | 0.25            |
| 4      | CCCO        | -118.211      | 33.876       | 29.50                                 | 30.26                              | 0.43     | -0.76           |

批注 [d40]: Modified for comment #37.

|    |      |          |        |       |       |      |       |
|----|------|----------|--------|-------|-------|------|-------|
| 5  | CGDM | -117.964 | 34.243 | 25.13 | 27.02 | 1.47 | -1.89 |
| 6  | CNPP | -117.608 | 33.857 | 30.87 | 29.84 | 1.37 | 1.03  |
| 7  | CVHS | -117.901 | 34.082 | 29.10 | 28.66 | 0.42 | 0.44  |
| 8  | DYHS | -118.125 | 33.937 | 29.03 | 29.50 | 0.30 | -0.47 |
| 9  | ECFS | -117.411 | 33.647 | 24.51 | 26.03 | 1.22 | -1.52 |
| 10 | EWPP | -117.525 | 34.104 | 26.71 | 25.98 | 0.46 | 0.73  |
| 11 | GVRs | -118.112 | 34.047 | 28.83 | 29.84 | 0.34 | -1.01 |
| 12 | HOLP | -118.168 | 33.924 | 29.53 | 29.77 | 0.50 | -0.24 |
| 13 | LBC1 | -118.137 | 33.832 | 30.29 | 29.78 | 0.32 | 0.51  |
| 14 | LBC2 | -118.173 | 33.791 | 29.31 | 29.68 | 0.32 | -0.37 |
| 15 | LBCH | -118.203 | 33.787 | 29.22 | 29.62 | 0.37 | -0.40 |
| 16 | LONG | -118.003 | 34.111 | 31.31 | 31.23 | 0.35 | 0.08  |
| 17 | LORS | -117.754 | 34.133 | 26.58 | 26.82 | 0.79 | -0.24 |
| 18 | MAT2 | -117.436 | 33.856 | 28.24 | 28.35 | 0.87 | -0.11 |
| 19 | NOCO | -117.569 | 33.919 | 30.77 | 29.51 | 0.90 | 1.26  |
| 20 | PSDM | -117.807 | 34.091 | 28.30 | 27.79 | 0.45 | 0.51  |
| 21 | RHCL | -118.026 | 34.019 | 28.53 | 29.36 | 0.64 | -0.83 |
| 22 | SBCC | -117.661 | 33.553 | 30.72 | 30.51 | 0.54 | 0.21  |
| 23 | SGDM | -117.861 | 34.205 | 27.87 | 27.15 | 1.16 | 0.72  |
| 24 | SPMS | -117.848 | 33.992 | 28.14 | 28.56 | 0.51 | -0.42 |
| 25 | VYAS | -117.992 | 34.030 | 30.39 | 29.24 | 0.52 | 1.15  |
| 26 | WCHS | -117.911 | 34.061 | 30.38 | 29.74 | 0.44 | 0.64  |
| 27 | WHC1 | -118.031 | 33.979 | 29.66 | 29.21 | 0.64 | 0.45  |
| 28 | WLSN | -118.055 | 34.226 | 18.08 | 20.92 | 1.61 | -2.84 |
| 29 | WNRA | -118.059 | 34.043 | 30.34 | 29.68 | 0.45 | 0.66  |

|     |      |
|-----|------|
| MAE | 0.70 |
| Std | 0.96 |

1

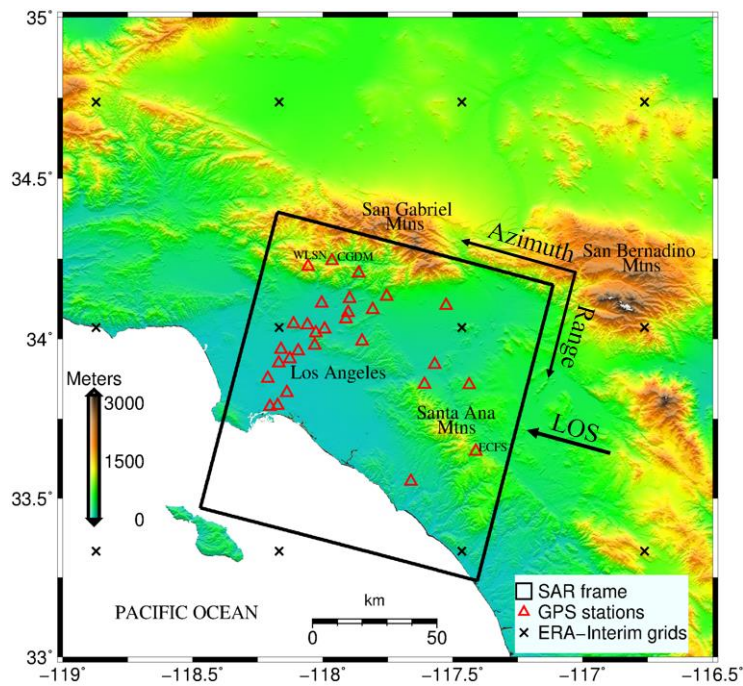

2

3

4 **Figure 1.** The topography map of the study area. The red triangles represent the locations of  
5 GPS stations. The locations of GPS stations CGDM, ECFS, and WLSN are indicated. The black  
6 box define the frame of ENVISAT ASAR images. Black crosses indicate the position of the  
7 ERA-Interim model grid nodes used in this study. **The arrow in the right side of the SAR frame**  
8 **indicates the line-of-sight (LOS) of the radar signal.**

9

批注 [d41]: Figure is modified to add the arrow to indicate the LOS direction. For comment #38.

批注 [d42]: Modified for comment #38.

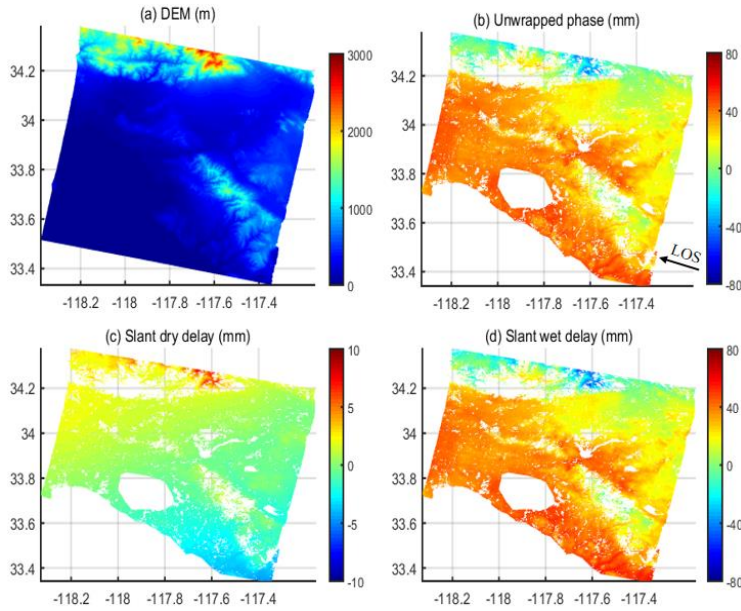

Figure 2. (a) Regional land topography from SRTM [at interferogram pixels]. (b) Unwrapped phase of differential interferogram (master image-16 August 2008, slave image-25 October 2008). (c) Slant hydrostatic delay maps predicted from ERA-Interim. (d) Slant wet delay obtained by subtracting (c) from (b). The rapidly subsiding areas are masked out in (b), (c), and (d).

批注 [d43]: Figure 2(b) is modified to add an arrow to indicate the LOS for comment #38.

批注 [d44]: Modified for comment #39.

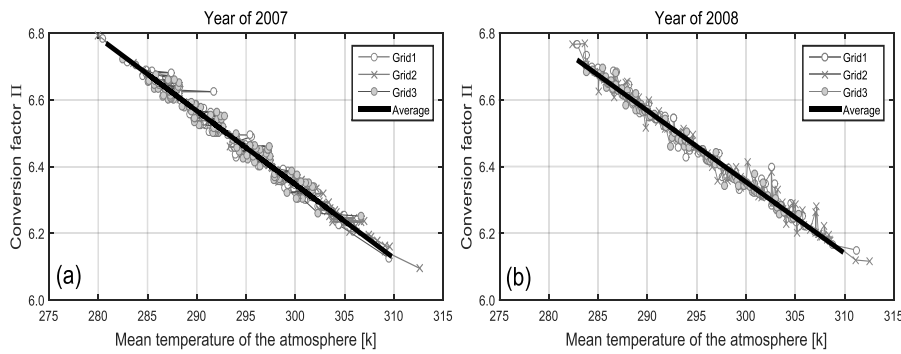

Figure 3. Conversion factor  $\Pi$  estimated based on the water vapor partial pressure and temperature extracted at three ERA-Interim model grids located within the SAR scene (see Fig. 1). The black line is the linear regression between the average of conversion factors and the mean temperature. The measurements were taken at 18:00 UTC (close to the SAR acquisition time of 18:01 UTC, making time difference between these two datasets negligible) over 120 days (10 days/month) in the year 2007 (a) and 2008 (b).

批注 [d45]: Figure is modified by changing the conversion factor to PI according to comment #8.

批注 [d46]: Modified for comment #9 and comment #40.

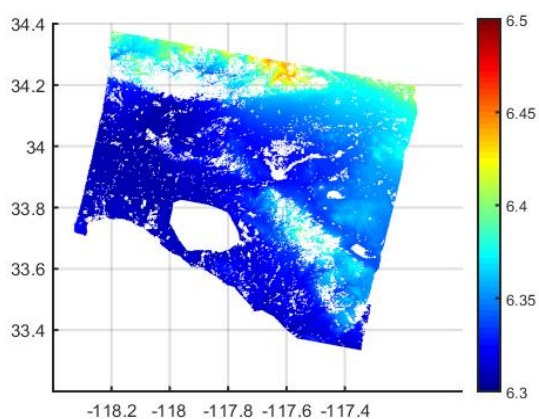

Figure 4. The spatial distribution of conversion factor  $\Pi$  calculated based on ERA-Interim. It is calculated at the time 18:00 UTC on 16 August 2008.

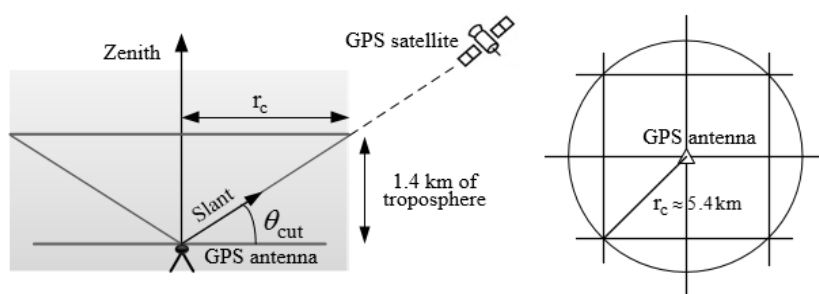

1 Figure 5. GPS receiver records a satellite signal at a cutoff elevation angle  $\theta_{\text{cut}}$  defining a  
 2 cone-like tropospheric section above the antenna. For  $\theta_{\text{cut}} = 15^\circ$ ,  $r_c \approx 5.4 \text{ km}$ . The  $\Delta\text{PWV}$   
 3 estimated by InSAR pixels within this circle are averaged to emulate GPS-based  $\Delta\text{PWV}$ .  
 4

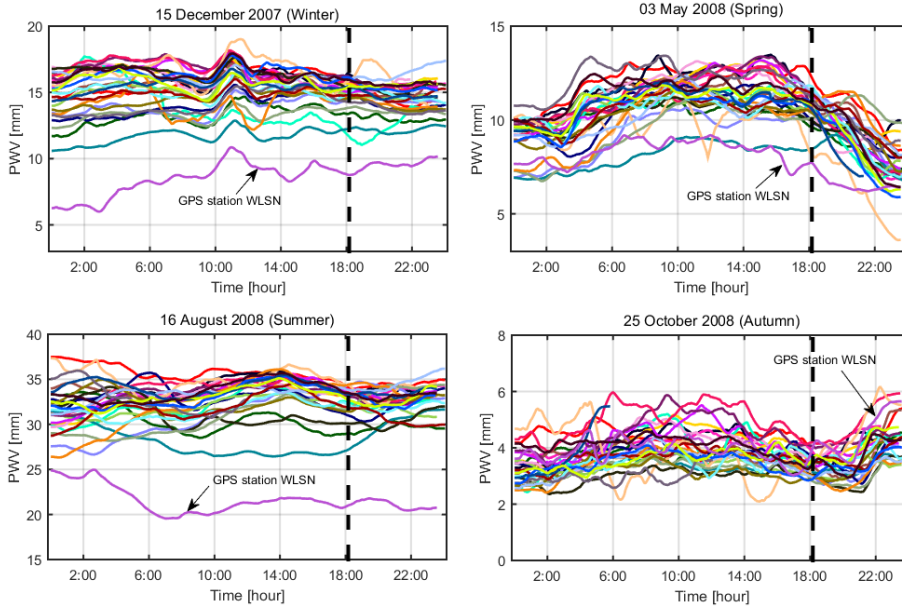

5  
 6  
 7 Figure 6. 24-hour time series of PWV estimated from GPS observations at 29 GPS stations  
 8 located in the study area (as shown in Fig. 1) on four SAR acquisition dates. The vertical black  
 9 dashed lines represent the SAR satellite overpass time (18:01 UTC). Black arrows in each plot  
 10 indicate the location of GPS station WLSN (altitude about 1700) on Mount Wilson. In general,  
 11 the higher GPS station is, the lower the PWV value.

12

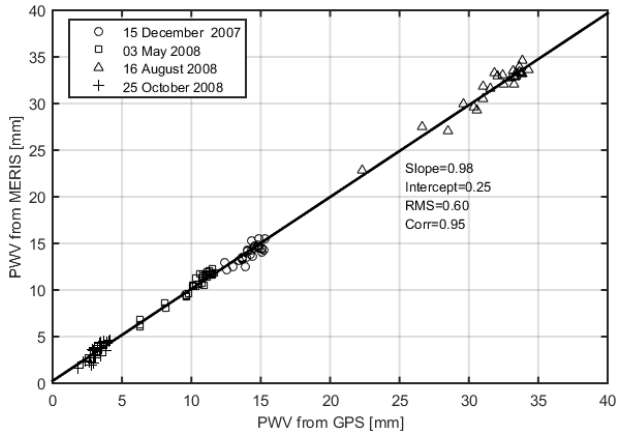

Figure.7 MERIS PWV against GPS PWV at 29 stations on four days of ENVISAT overpass time. The MERIS observations are averaged within circles of 5.4 km radius centered on the GPS station.

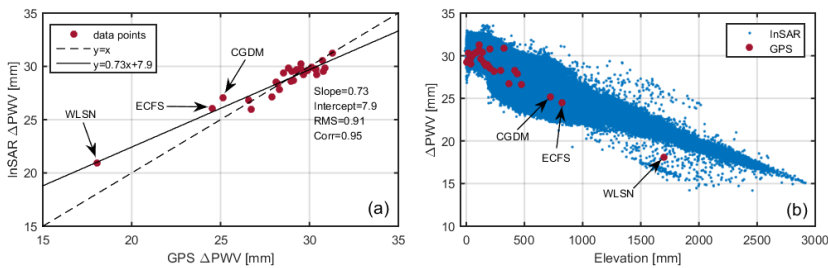

Figure 8. (a) GPS  $\Delta$ PWV plotted against the calibrated  $\Delta$ PWV from the interferogram (master image-16 August 2008, slave image-25 October 2008). The slope of the solid line in the figure is 0.73, large differences were found on stations CGDM, ECFS, and WLSN. (b) GPS (red) and InSAR (blue)  $\Delta$ PWV plotted as a function of elevation. Black arrows indicate the location of GPS sites CGDM, ECFS, and WLSN.



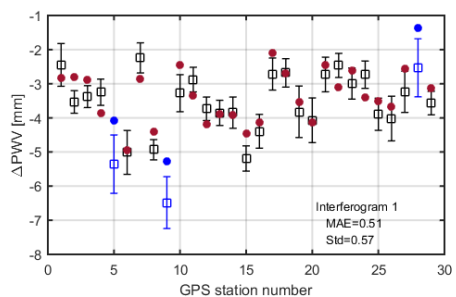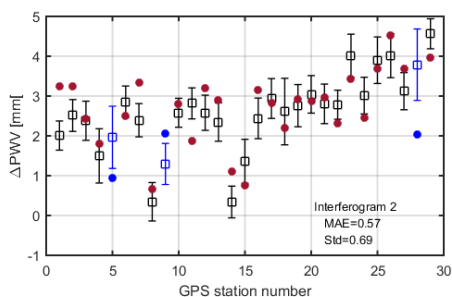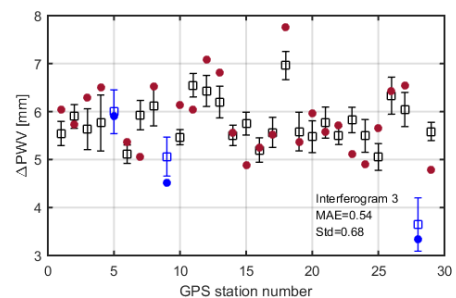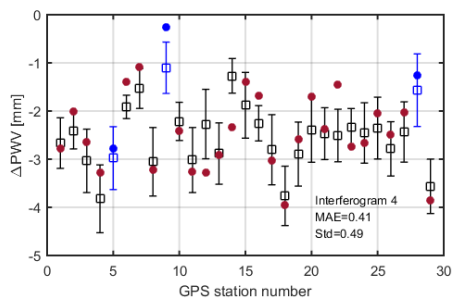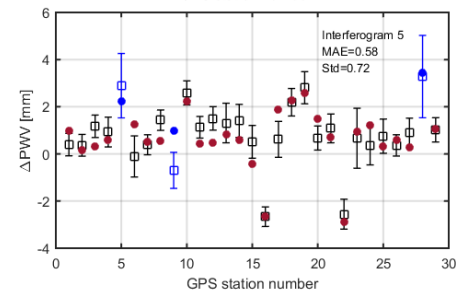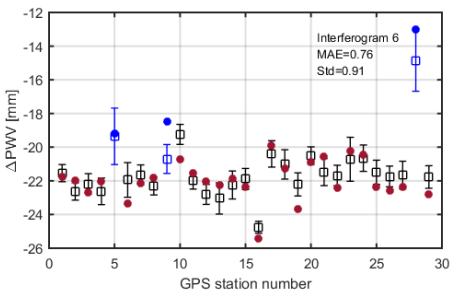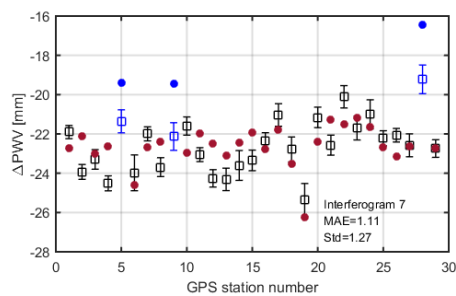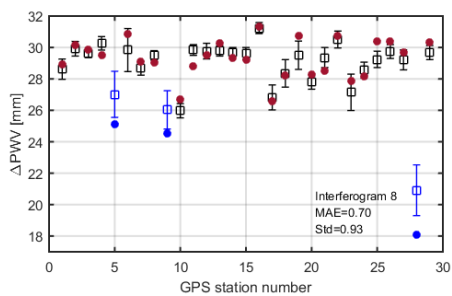

1

2

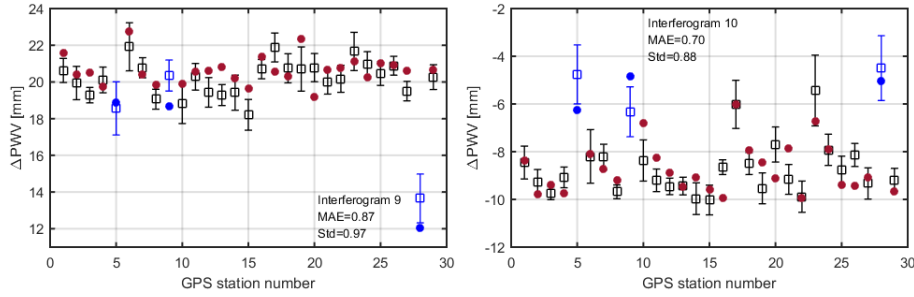

Figure 9. Comparisons of  $\Delta PWV$  estimates from InSAR (squares) and collocated GPS measurements for each GPS station (circles). The InSAR  $\Delta PWV$  are estimated from the ten interferograms in Table 1. The squares indicate  $\Delta PWV$  estimates from InSAR that are obtained by averaging all pixels falling within the circular area with a radius of 5.4 km centered around the station, corresponding to the observational cone above the GPS receiver. The error bars denote standard deviation of the pixel values in the circular area. The blue color in each plot (from left to right) represent the GPS stations CGDM, ECFS and WLSN, respectively.

1

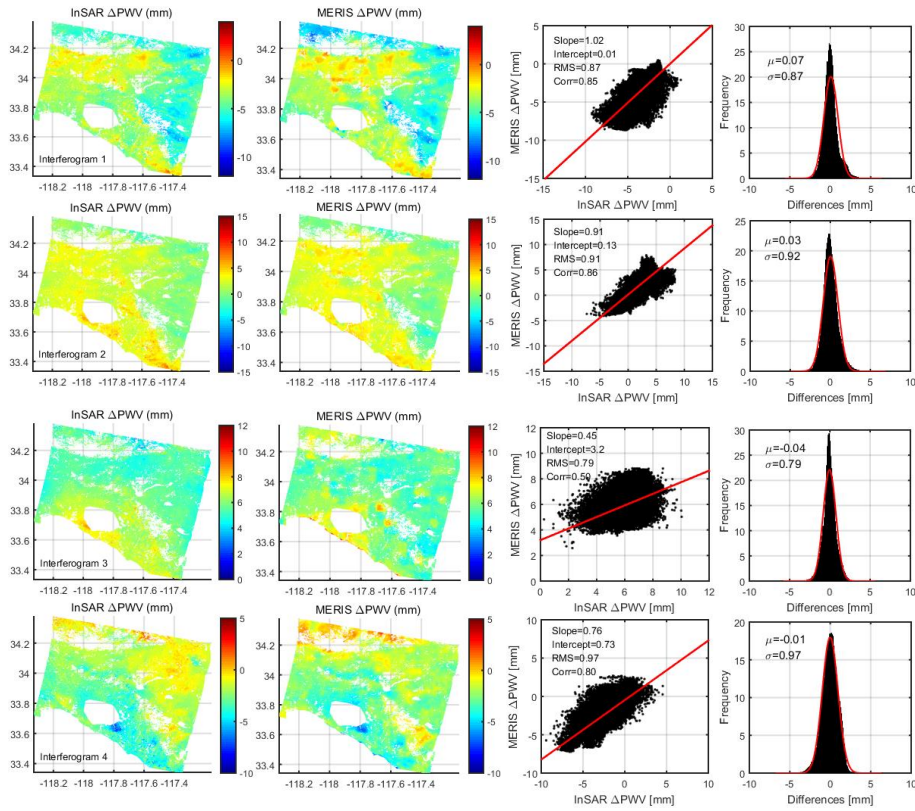

2

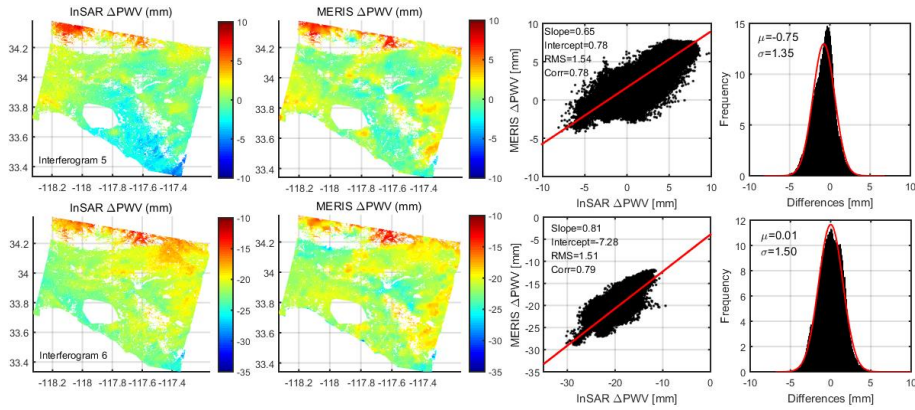

3

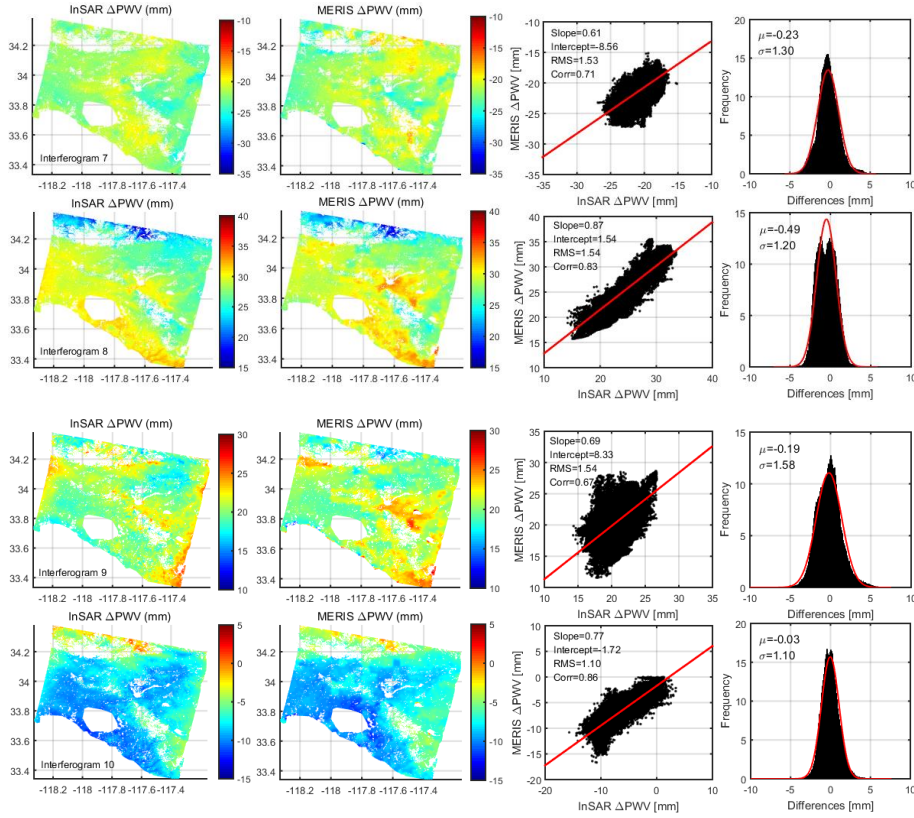

Figure 10. Comparison of the  $\Delta PWV$  maps derived from InSAR and MERIS. For all images here, the root mean square (RMS), correlation (Corr), differential mean ( $\mu$ ), and standard deviation ( $\sigma$ ) are computed.
